# Supplementary material for: The Triggering Receptor Expressed on Myeloid Cells 2 Inhibits Complement Component 1q Effector Mechanisms and Exerts Detrimental Effects during Pneumococcal Pneumonia
Source: PLOS journal article supplement (doi:10.1371/journal.ppat.1004167), 2014-06-12
Supplement: S2 (10.1371/journal.ppat.1004167.s002) [file journal.ppat.1004167.s002]

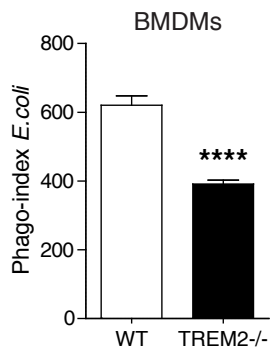

**Supplementary Figure 2: TREM-2 deficient BMDM exhibit lower phagocytosis of *E.coli***

WT and *Trem-2*<sup>-/-</sup> BMDM were incubated with FITC labeled *E. coli* at an MOI of 100 and phagocytosis was assessed 1h later by FACS. Data are presented as mean  $\pm$  SEM versus WT, \*\*\*\*  
p < 0.0001 and are representative of two independent experiments.
