# Supplementary material for: The Triggering Receptor Expressed on Myeloid Cells 2 Inhibits Complement Component 1q Effector Mechanisms and Exerts Detrimental Effects during Pneumococcal Pneumonia
Source: PLOS journal article supplement (doi:10.1371/journal.ppat.1004167), 2014-06-12
Supplement: S5 (10.1371/journal.ppat.1004167.s005) [file journal.ppat.1004167.s005]

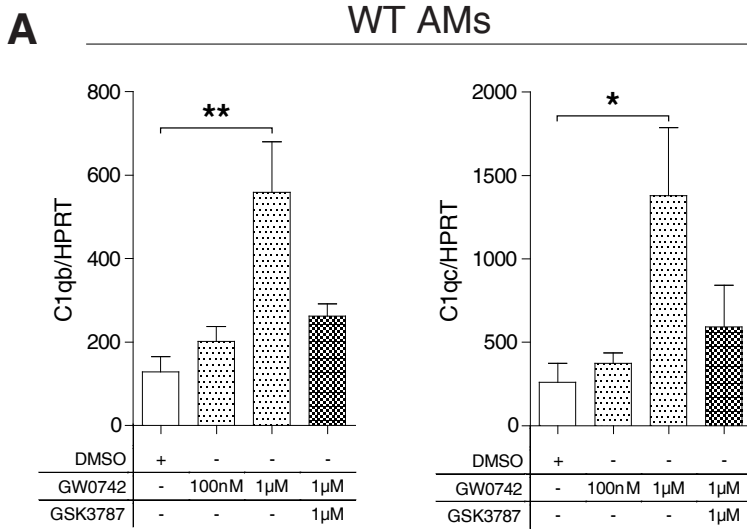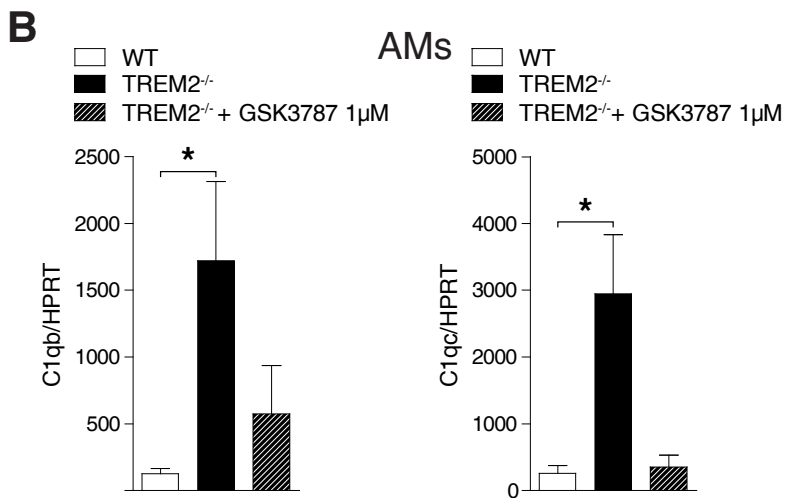

### Supplementary Figure 5: Dependence of C1q expression in AMs on PPAR- $\delta$

**(A)** WT AM were pre-treated for 24h with the indicated doses of the PPAR- $\delta$  activator GW0742 in combination with the PPAR- $\delta$  inhibitor GSK3787 along with a DMSO control after which RT-PCR of *C1qb* and *C1qc* was performed. **(B)** WT and *Trem-2<sup>-/-</sup>* AM were treated with DMSO or the PPAR- $\delta$  inhibitor GSK3787 after which RT-PCR of *C1qb* and *C1qc* was performed. Data are presented as mean  $\pm$  SEM and compared versus WT with \*  $p < 0.05$ , \*\*  $p < 0.005$ .
