# Supplementary material for: The Triggering Receptor Expressed on Myeloid Cells 2 Inhibits Complement Component 1q Effector Mechanisms and Exerts Detrimental Effects during Pneumococcal Pneumonia
Source: PLOS journal article supplement (doi:10.1371/journal.ppat.1004167), 2014-06-12
Supplement: S7 (10.1371/journal.ppat.1004167.s007) [file journal.ppat.1004167.s007]

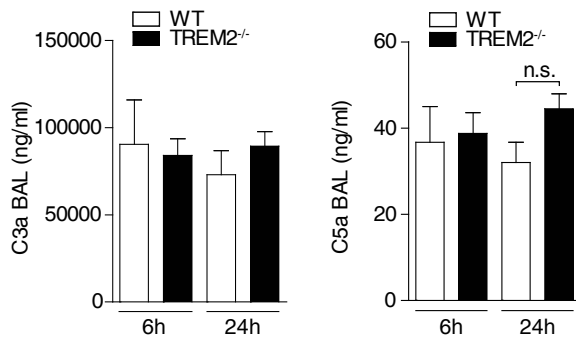

**Supplementary Figure 7: Unaltered C3a and C5a levels in the BALF of *TREM-2*<sup>-/-</sup> mice following *S. pneumoniae* infection**

WT and *Trem-2*<sup>-/-</sup> mice (n = 6-7 mice per genotype) were intranasally infected with 10<sup>5</sup> *S. pneumoniae* and C3a and C5a levels were determined in the BALF 6 and 24h post infection. Data represent mean ± SEM versus WT.
