# Supplementary material for: The Triggering Receptor Expressed on Myeloid Cells 2 Inhibits Complement Component 1q Effector Mechanisms and Exerts Detrimental Effects during Pneumococcal Pneumonia
Source: PLOS journal article supplement (doi:10.1371/journal.ppat.1004167), 2014-06-12
Supplement: S8 (10.1371/journal.ppat.1004167.s008) [file journal.ppat.1004167.s008]

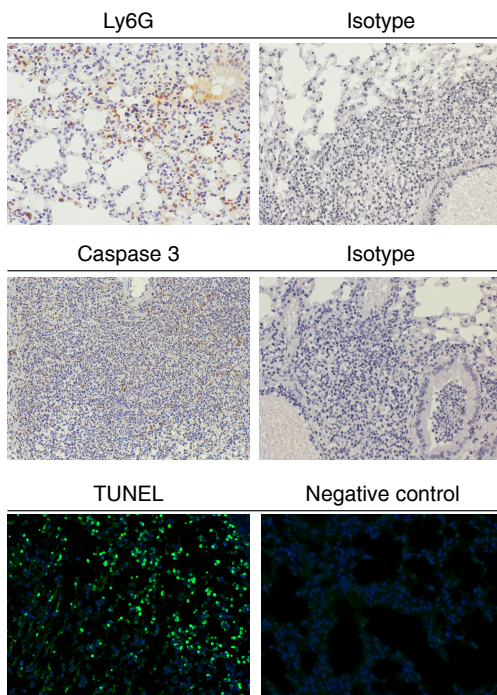

### Supplementary Figure 8: Specificity of antibodies used in Immunohistochemistry and TUNEL

Representative Ly6G, active caspase 3, and TUNEL staining of lungs 48h post infection of mice infected with  $10^5$  *S. pneumoniae* (n= 9) depicting the specificities of the antibodies used.
